# Supplementary material for: Circulating microRNAs as Biomarkers for Primary Open-Angle Glaucoma: A Case-Control Study
Source: Research Square preprint supplement (doi:10.21203/rs.3.rs-8814911/v1), 2026-02-24
Supplement: Supplementary file 1 [file d822b6a3d8fced84f3ff9e9b.docx]

**Circulating microRNAs as Biomarkers for Primary Open-Angle Glaucoma: A Case-Control Study**

Eiman Meer1, Yousaf Jamal Mahsood2, Fazli Wahid1,3, Muhammad Ilyas4, Sanna Khan5, Bakht Daniyal Khan2, Hussain Hussain2, Humaira Ayub1*

1*Department of Biological & Health Sciences, Pak-Austria Fachhochschule: Institute of Applied Sciences &Technology, Haripur, Khyber Pakhtunkhwa, Pakistan

2Department of Ophthalmology, Khyber Girls Medical College, Hayatabad Medical Complex, Peshawar, Khyber Pakhtunkhwa, Pakistan

3Terasaki Institute for Biomedical Innovation, Los Angeles, United States of America

4Center for Omic Sciences, Islamia College Peshawar, Khyber Pakhtunkhwa, Pakistan

5 School of Mechanical and Manufacturing Engineering, Dublin City University, Dublin, Ireland

*Correspondence

Humaira Ayub

Email: [humaira.ayub@fbse.paf-iast.edu.pk](mailto:humaira.ayub@fbse.paf-iast.edu.pk)

**mir-210-3p Ct values in Plasma**

| Sample size | 90 |
| --- | --- |

**Descriptive statistics**

| Factor | n | Minimum | 25th percentile | Median | 75th percentile | Maximum |
| --- | --- | --- | --- | --- | --- | --- |
| CATRACT | 30 | 31.5070 | 31.755 | 32.022 | 32.294 | 33.883 |
| NORMAL | 30 | 32.1060 | 34.205 | 34.989 | 35.961 | 39.258 |
| POAG | 30 | 28.1470 | 28.946 | 29.482 | 30.120 | 31.810 |

**Kruskal-Wallis test**

| Test statistic | 78.1042 |
| --- | --- |
| Corrected for ties | 78.1042 |
| Degrees of Freedom (DF) | 2 |
| Significance level | P < 0.000001 |

**Post-hoc analysis (Conover)**

| Factor | n | Average Rank | Different (P<0.05) from factor nr |
| --- | --- | --- | --- |
| (1) CATRACT | 30 | 45.63 | (2)(3) |
| (2) NORMAL | 30 | 75.58 | (1)(3) |
| (3) POAG | 30 | 15.80 | (1)(2) |

**Mir-210-3p Fold Change in plasma**


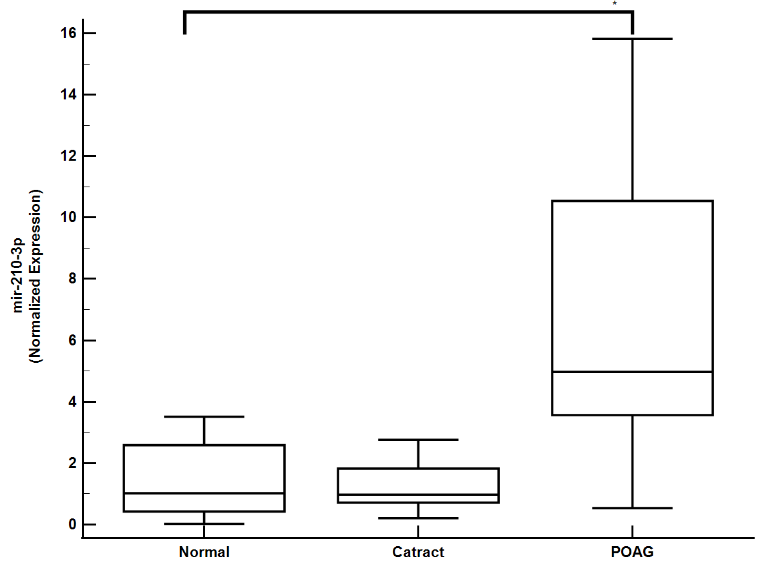


| Data | mir_210_3p_Fold_Change mir-210-3p Fold Change |
| --- | --- |
| Factor | GROUP |

**Descriptive statistics**

| Factor | n | Minimum | 25th percentile | Median | 75th percentile | Maximum |
| --- | --- | --- | --- | --- | --- | --- |
| CATRACT | 30 | 0.2070 | 0.756 | 1.120 | 1.844 | 2.762 |
| NORMAL | 30 | 0.02349 | 0.427 | 1.021 | 2.585 | 14.970 |
| POAG | 30 | 1.0510 | 3.649 | 5.176 | 11.305 | 21.436 |

**Kruskal-Wallis test**

| Test statistic | 43.0314 |
| --- | --- |
| Corrected for ties | 43.0314 |
| Degrees of Freedom (DF) | 2 |
| Significance level | P < 0.000001 |

**Post-hoc analysis (Conover)**

| Factor | n | Average Rank | Different (P<0.05) from factor nr |
| --- | --- | --- | --- |
| (1) CATRACT | 30 | 33.30 | (3) |
| (2) NORMAL | 30 | 33.23 | (3) |
| (3) POAG | 30 | 71.90 | (1)(2) |

**mir-210-3p Ct values in Aqueous humor**

|  | Sample 1 | Sample 2 |
| --- | --- | --- |
| Sample size | 30 | 30 |
| Lowest value | [33.2300](cmd:SHOWXMINMAX?20) | [32.2470](cmd:SHOWYMINMAX?5) |
| Highest value | [34.9990](cmd:SHOWXMINMAX?23) | [36.1900](cmd:SHOWYMINMAX?16) |
| Median | 34.3090 | 33.9855 |
| 95% CI for the median | 33.9305 to 34.7089 | 33.7133 to 34.4798 |
| Interquartile range | 33.8540 to 34.8060 | 33.3610 to 34.7450 |

| Hodges-Lehmann median difference | -0.2120 |
| --- | --- |
| 95% Confidence interval | -0.6530 to 0.1310 |

**Mann-Whitney test (independent samples)**

| Average rank of the first group | 33.1000 |
| --- | --- |
| Average rank of the second group | 27.9000 |
| Mann-Whitney U | 372.00 |
| Test statistic Z | -1.153 |
| Two-tailed probability | P = 0.2488 |

**mir-210-3p fold changes in AH**


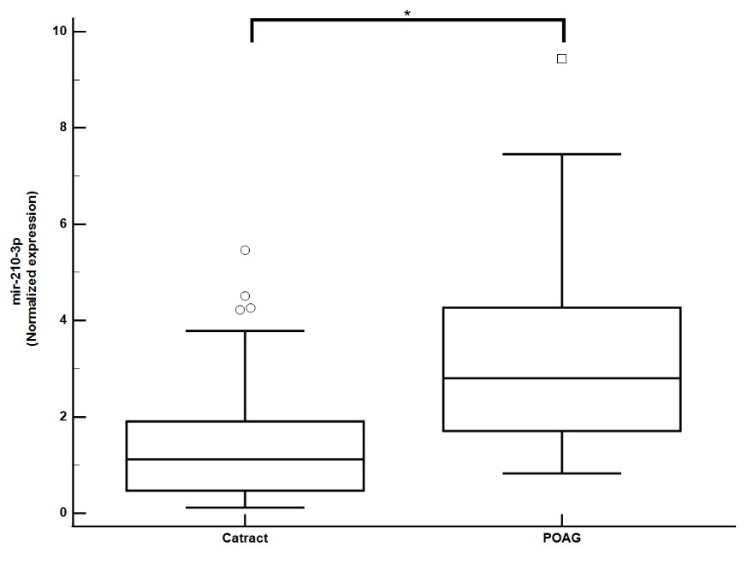


|  | Sample 1 | Sample 2 |
| --- | --- | --- |
| Sample size | 30 | 30 |
| Lowest value | [0.1190](cmd:SHOWXMINMAX?5) | [0.8260](cmd:SHOWYMINMAX?20) |
| Highest value | [5.4680](cmd:SHOWXMINMAX?29) | [9.4350](cmd:SHOWYMINMAX?5) |
| Median | 1.1200 | 2.8050 |
| 95% CI for the median | 0.5744 to 1.6659 | 1.7527 to 3.7717 |
| Interquartile range | 0.4700 to 1.9070 | 1.7080 to 4.2710 |

| Hodges-Lehmann median difference | 1.3440 |
| --- | --- |
| 95% Confidence interval | 0.6470 to 2.2500 |

**Mann-Whitney test (independent samples)**

| Average rank of first group | 22.2667 |
| --- | --- |
| Average rank of second group | 38.7333 |
| Mann-Whitney U | 203.00 |
| Test statistic Z | -3.652 |
| Two-tailed probability | P = 0.0003 |

**mir-143-3p CT Values in plasma**

**Descriptive statistics**

| Factor | n | Minimum | 25th percentile | Median | 75th percentile | Maximum |
| --- | --- | --- | --- | --- | --- | --- |
| CATRACT | 30 | 29.3950 | 30.156 | 30.636 | 31.423 | 32.634 |
| NORMAL | 30 | 29.1900 | 29.982 | 30.481 | 31.074 | 33.123 |
| POAG | 30 | 29.3710 | 29.916 | 30.260 | 30.800 | 33.834 |

**Kruskal-Wallis test**

| Test statistic | 2.3863 |
| --- | --- |
| Corrected for ties | 2.3863 |
| Degrees of Freedom (DF) | 2 |
| Significance level | P = 0.303269 |

| Factor | N | Average Rank |
| --- | --- | --- |
| (1) CATRACT | 30 | 50.05 |
| (2) NORMAL | 30 | 46.63 |
| (3) POAG | 30 | 39.82 |

**mir-143-3p Fold Change in plasma**

**
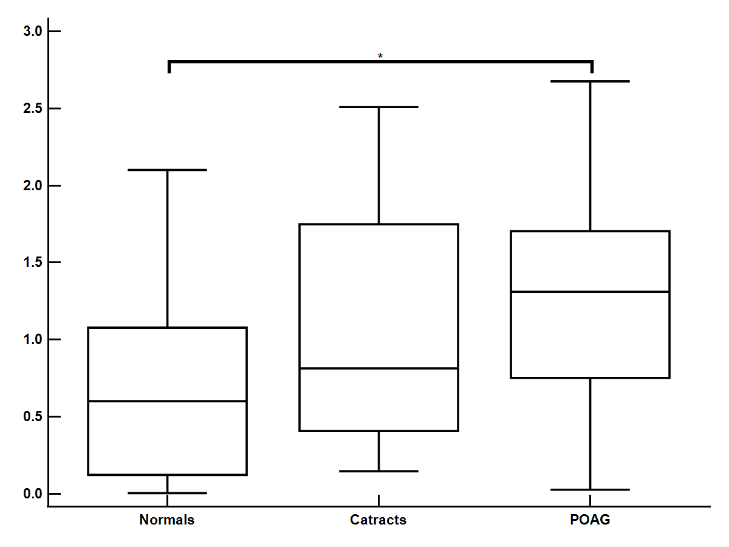
**

| Sample size | 90 |
| --- | --- |

**Descriptive statistics**

| Factor | n | Minimum | 25th percentile | Median | 75th percentile | Maximum |
| --- | --- | --- | --- | --- | --- | --- |
| CATRACT | 30 | 0.1470 | 0.408 | 0.814 | 1.749 | 2.509 |
| NORMAL | 30 | 0.005000 | 0.123 | 0.601 | 1.078 | 2.101 |
| POAG | 30 | 0.02700 | 0.752 | 1.311 | 1.704 | 2.676 |

**Kruskal-Wallis test**

| Test statistic | 11.5394 |
| --- | --- |
| Corrected for ties | 11.5395 |
| Degrees of Freedom (DF) | 2 |
| Significance level | P = 0.003121 |

**Post-hoc analysis (Conover)**

| Factor | N | Average Rank | Different (P<0.05) from factor nr |
| --- | --- | --- | --- |
| (1) CATRACT | 30 | 49.63 | (2) |
| (2) NORMAL | 30 | 32.55 | (1)(3) |
| (3) POAG | 30 | 54.32 | (2) |

**mir-143-3p CT values in Aqueous Humor**

|  | **Sample 1** | **Sample 2** |
| --- | --- | --- |
| **Sample size** | **30** | **30** |
| **Lowest value** | [**26.4020**](cmd:SHOWXMINMAX?10) | [**28.8910**](cmd:SHOWYMINMAX?26) |
| **Highest value** | [**30.6780**](cmd:SHOWXMINMAX?12) | [**31.6030**](cmd:SHOWYMINMAX?6) |
| **Median** | **27.4085** | **30.1785** |
| **95% CI for the median** | **27.0670 to 27.7301** | **29.9927 to 30.4032** |
| **Interquartile range** | **26.9820 to 27.7820** | **29.8350 to 30.4800** |

| **Hodges-Lehmann median difference** | **2.8180** |
| --- | --- |
| **95% Confidence interval** | **2.4770 to 3.1380** |

**Mann-Whitney test (independent samples)**

| **Average rank of first group** | **16.2667** |
| --- | --- |
| **Average rank of second group** | **44.7333** |
| **Mann-Whitney U** | **23.00** |
| **Test statistic Z** | **-6.313** |
| **Two-tailed probability** | **P < 0.0001** |

**Mir-143-3p AH Fold change**


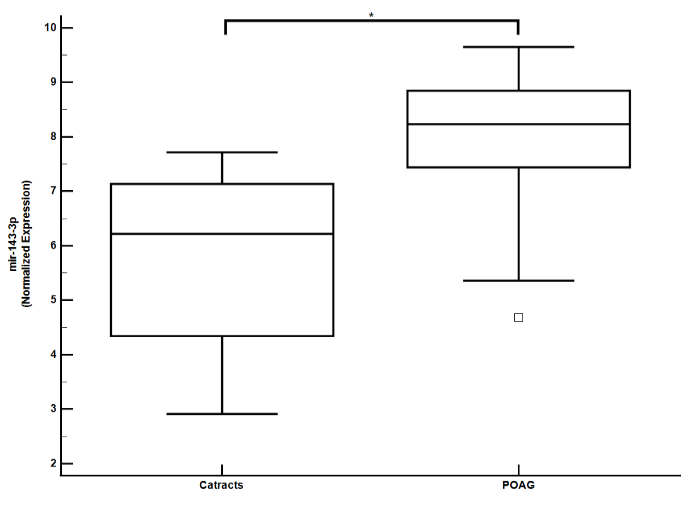


| Sample 1 | |
| --- | --- |
| Variable | POAG |
| Sample 2 | |
| Variable | Cataracts |
|  |  |

|  | Sample 1 | Sample 2 |
| --- | --- | --- |
| Sample size | 30 | 30 |
| Lowest value | [4.6870](cmd:SHOWXMINMAX?14) | [2.9138](cmd:SHOWYMINMAX?5) |
| Highest value | [9.6500](cmd:SHOWXMINMAX?28) | [7.7172](cmd:SHOWYMINMAX?8) |
| Median | 8.2350 | 6.2203 |
| 95% CI for the median | 7.7797 to 8.7548 | 5.0643 to 6.9733 |
| Interquartile range | 7.4400 to 8.8480 | 4.3462 to 7.1369 |

| Hodges-Lehmann median difference | -1.9751 |
| --- | --- |
| 95% Confidence interval | -2.8086 to -1.3100 |

**Mann-Whitney test (independent samples)**

| Average rank of first group | 41.9000 |
| --- | --- |
| Average rank of second group | 19.1000 |
| Mann-Whitney U | 108.00 |
| Test statistic Z | -5.056 |
| Two-tailed probability | P < 0.0001 |

**ROC analysis**


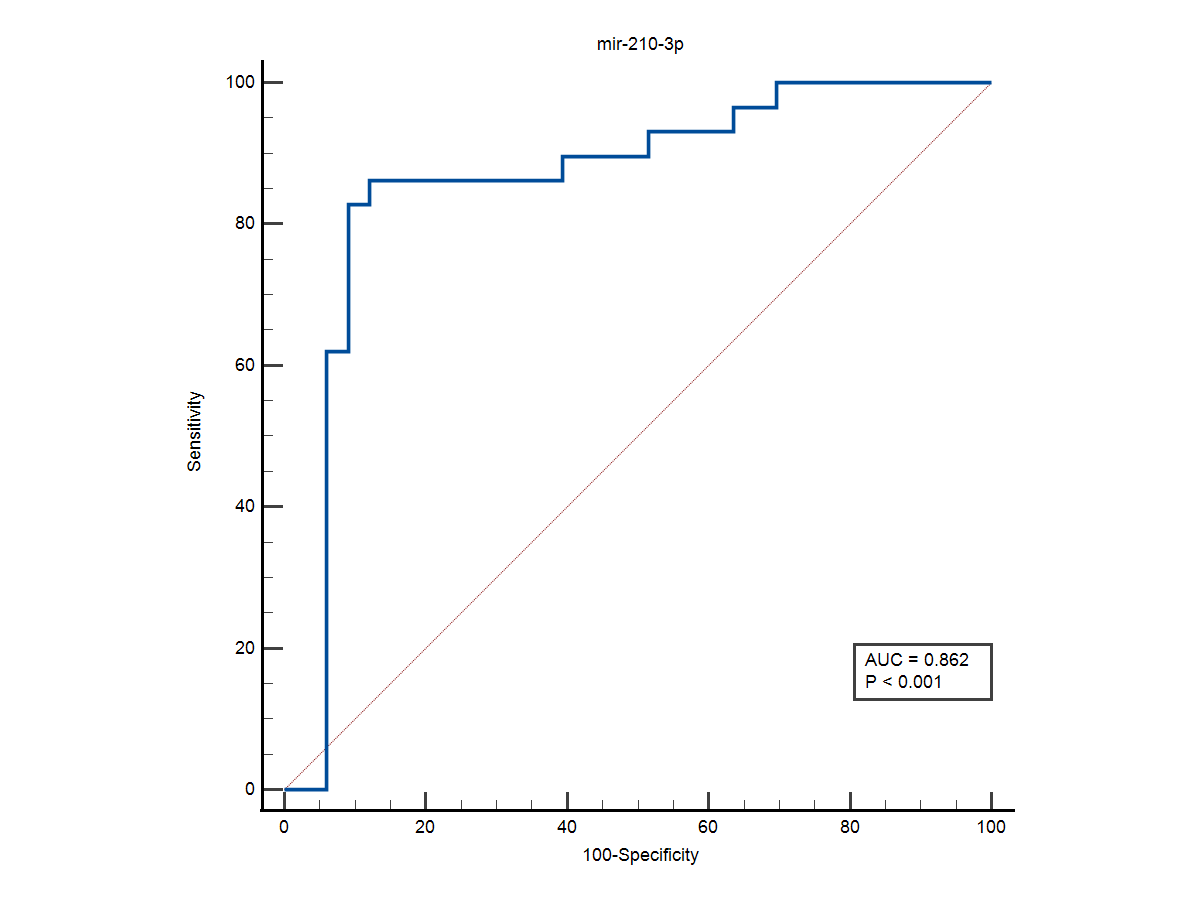


| Variable | mir_210 mir-210 |
| --- | --- |
| Classification variable | Groups |

| Sample size | 60 |
| --- | --- |
| Positive group a | 30 |
| Negative group b | 30 |

a Groups = 1
b Groups = 0

| Disease prevalence (%) | unknown |
| --- | --- |

**Area under the ROC curve (AUC)**

| Area under the ROC curve (AUC) | 0.862 |
| --- | --- |
| Standard Error a | 0.0528 |
| 95% Confidence interval b | 0.751 to 0.936 |
| z statistic | 6.864 |
| Significance level P (Area=0.5) | <0.0001 |

a DeLong et al., 1988

b Binomial exact

**Youden index**

| Youden index J | 0.7409 |
| --- | --- |
| Associated criterion | >3.470154749 |
| Sensitivity | 86.21 |
| Specificity | 87.88 |

**Criterion values and coordinates of the ROC curve** [[Show]](javascript:showdiv('d0','d1','table1');)

**Criterion values and coordinates of the ROC curve** [[Hide]](javascript:hidediv('d0','d1','table1');)

| Criterion | Sensitivity | 95% CI | Specificity | 95% CI | +LR | -LR |
| --- | --- | --- | --- | --- | --- | --- |
| ≥0.25774208 | 100.00 | 88.1 - 100.0 | 0.00 | 0.0 - 10.6 | 1.00 |  |
| >1.023486898 | 100.00 | 88.1 - 100.0 | 30.30 | 15.6 - 48.7 | 1.43 | 0.00 |
| >1.051 | 96.55 | 82.2 - 99.9 | 30.30 | 15.6 - 48.7 | 1.39 | 0.11 |
| >1.172834949 | 96.55 | 82.2 - 99.9 | 36.36 | 20.4 - 54.9 | 1.52 | 0.095 |
| >1.173 | 93.10 | 77.2 - 99.2 | 36.36 | 20.4 - 54.9 | 1.46 | 0.19 |
| >1.4054187 | 93.10 | 77.2 - 99.2 | 48.48 | 30.8 - 66.5 | 1.81 | 0.14 |
| >1.411 | 89.66 | 72.6 - 97.8 | 48.48 | 30.8 - 66.5 | 1.74 | 0.21 |
| >2.418413121 | 89.66 | 72.6 - 97.8 | 60.61 | 42.1 - 77.1 | 2.28 | 0.17 |
| >2.436 | 86.21 | 68.3 - 96.1 | 60.61 | 42.1 - 77.1 | 2.19 | 0.23 |
| >3.470154749 | 86.21 | 68.3 - 96.1 | 87.88 | 71.8 - 96.6 | 7.11 | 0.16 |
| >3.512 | 82.76 | 64.2 - 94.2 | 87.88 | 71.8 - 96.6 | 6.83 | 0.20 |
| >3.513721873 | 82.76 | 64.2 - 94.2 | 90.91 | 75.7 - 98.1 | 9.10 | 0.19 |
| >4.103 | 62.07 | 42.3 - 79.3 | 90.91 | 75.7 - 98.1 | 6.83 | 0.42 |
| >4.114070686 | 62.07 | 42.3 - 79.3 | 93.94 | 79.8 - 99.3 | 10.24 | 0.40 |
| >14.156 | 0.00 | 0.0 - 11.9 | 93.94 | 79.8 - 99.3 | 0.00 | 1.06 |
| >14.96997597 | 0.00 | 0.0 - 11.9 | 100.00 | 89.4 - 100.0 |  | 1.00 |

**mir-143-3p ROC analysis**


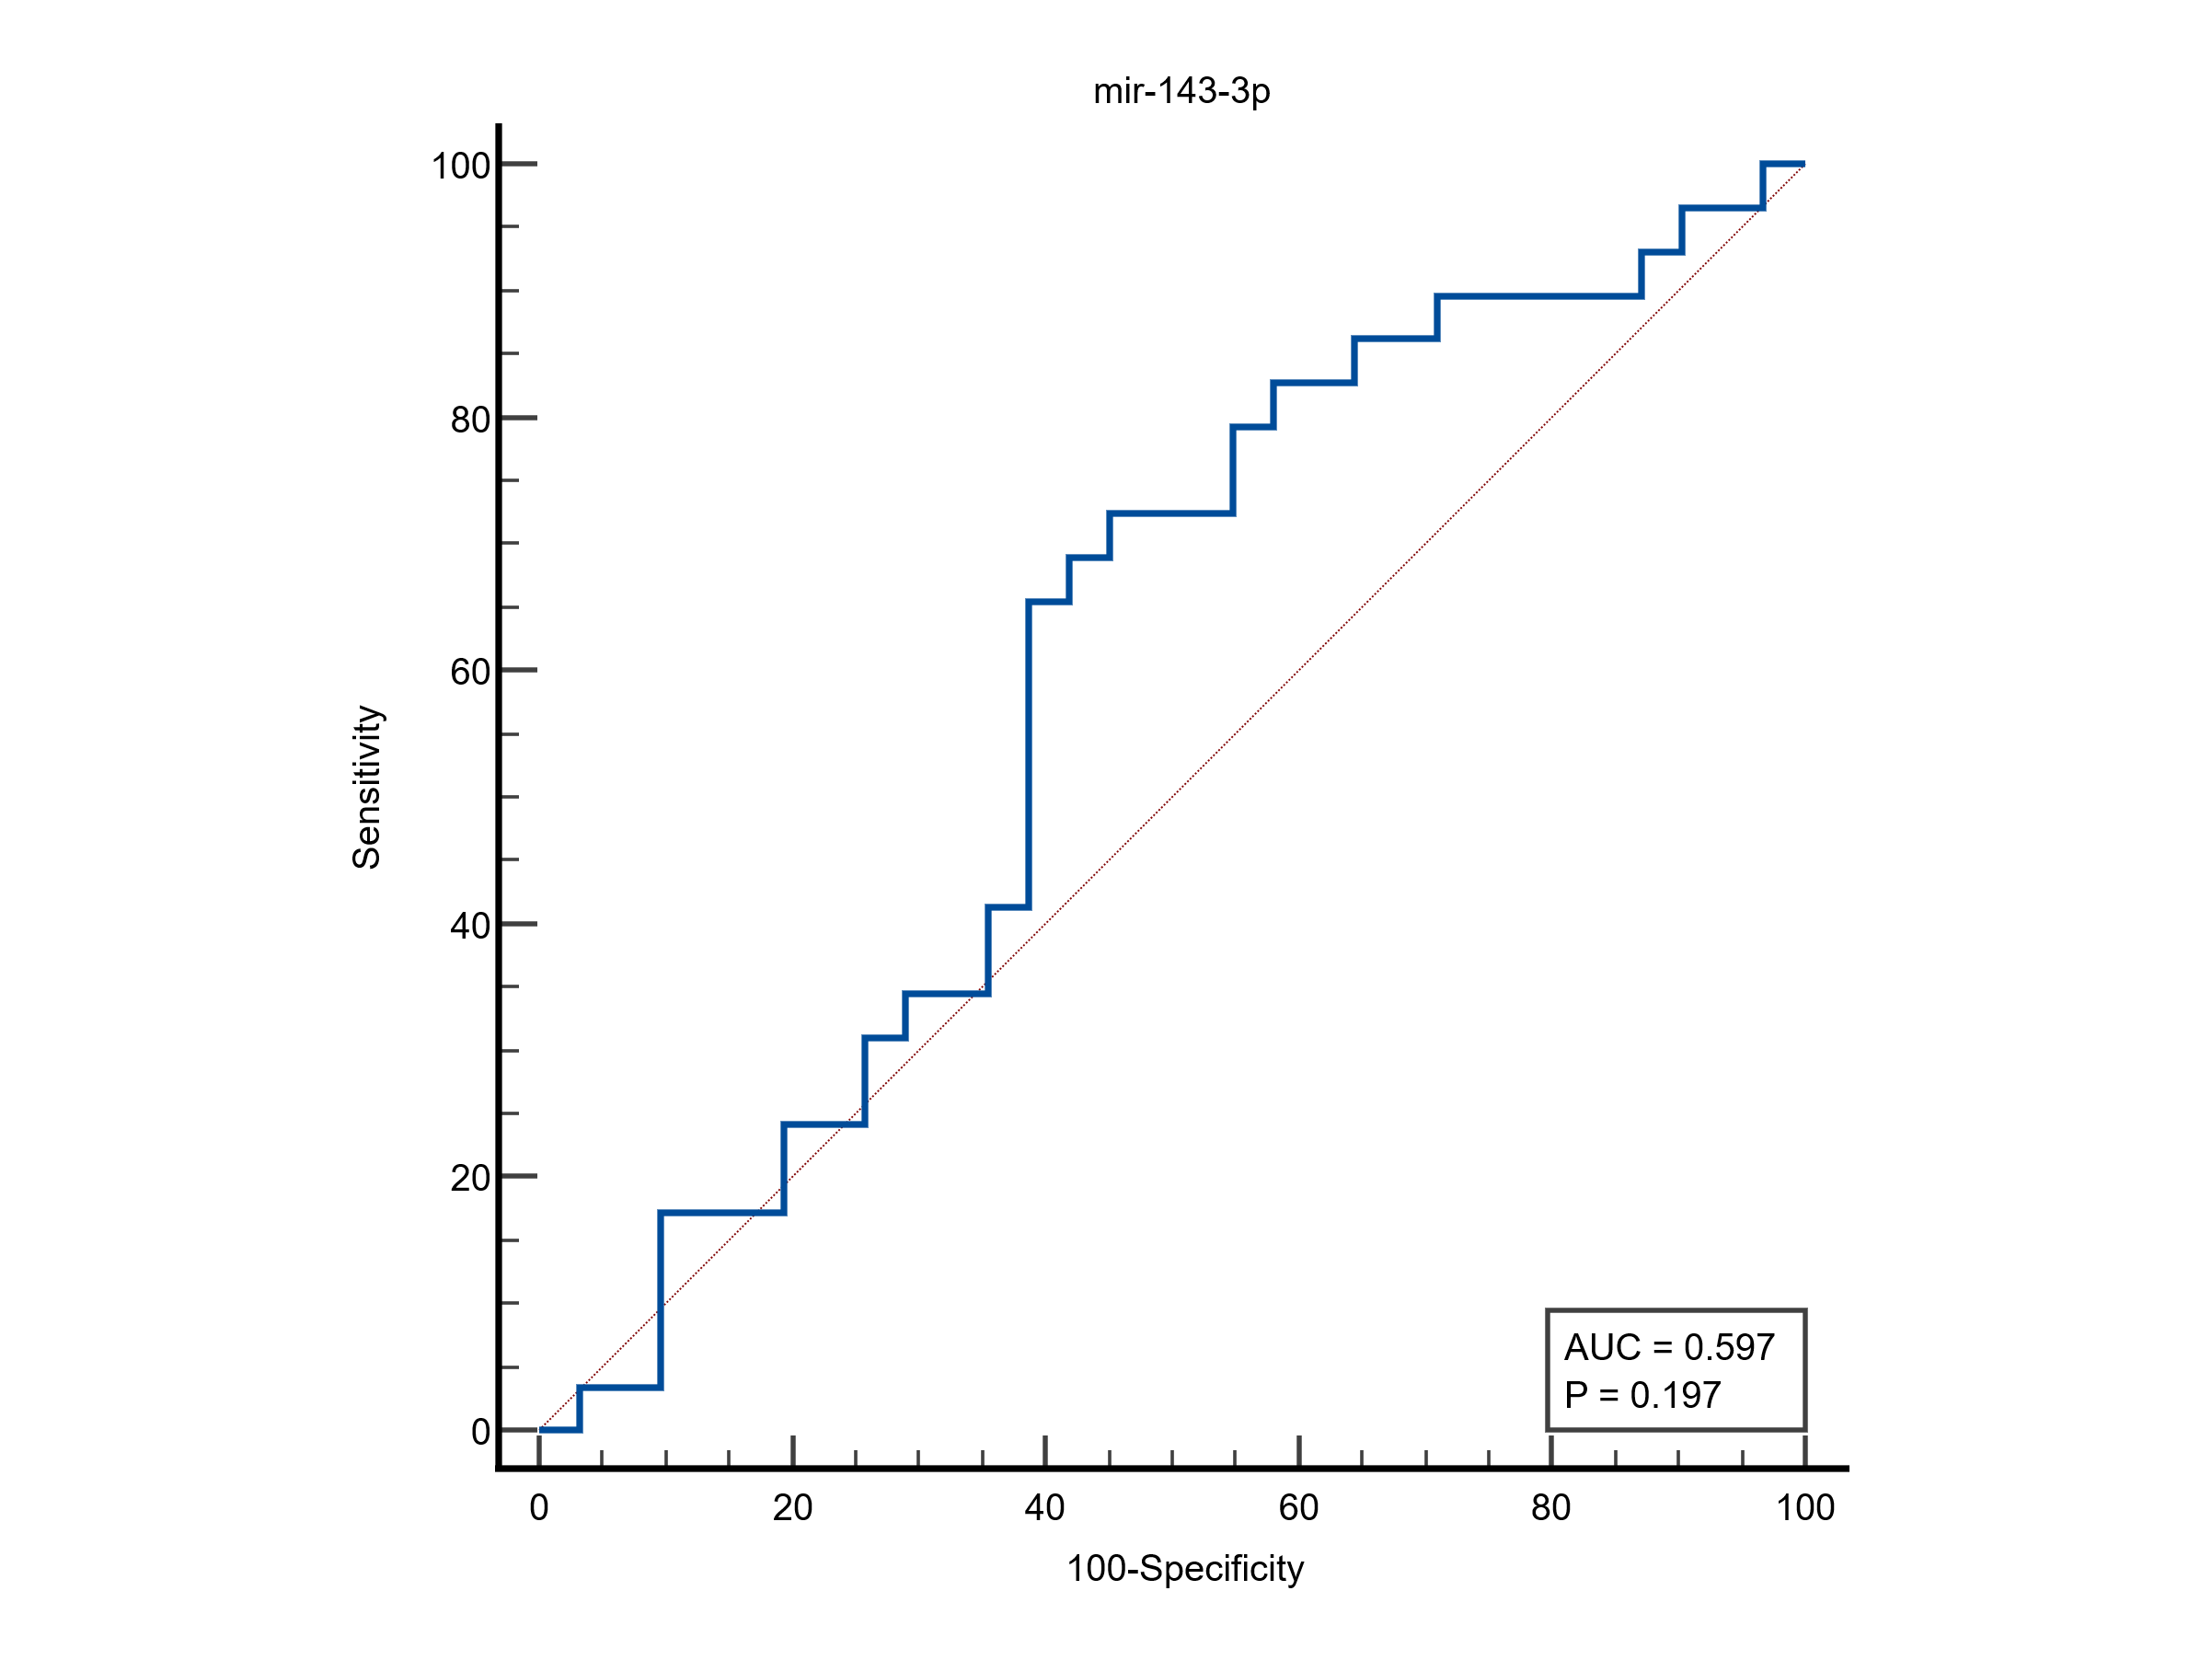


| Sample size | 60 |
| --- | --- |
| Positive group a | 30 |
| Negative group b | 30 |

a Group = 1
b Group = 0

**Area under the ROC curve (AUC)**

| Area under the ROC curve (AUC) | 0.597 |
| --- | --- |
| Standard Error a | 0.0754 |
| 95% Confidence interval b | 0.463 to 0.722 |
| z statistic | 1.291 |
| Significance level P (Area=0.5) | 0.1968 |

a DeLong et al., 1988

b Binomial exact

**Youden index**

| Youden index J | 0.2725 |
| --- | --- |
| Associated criterion | >1.222 |
| Sensitivity | 72.41 |
| Specificity | 54.84 |

**Criterion values and coordinates of the ROC curve**

| Criterion | Sensitivity | 95% CI | Specificity | 95% CI | +LR | -LR |
| --- | --- | --- | --- | --- | --- | --- |
| ≥0.083 | 100.00 | 88.1 - 100.0 | 0.00 | 0.0 - 11.2 | 1.00 |  |
| >0.083 | 100.00 | 88.1 - 100.0 | 3.23 | 0.08 - 16.7 | 1.03 | 0.00 |
| >0.195 | 96.55 | 82.2 - 99.9 | 3.23 | 0.08 - 16.7 | 1.00 | 1.07 |
| >0.245 | 96.55 | 82.2 - 99.9 | 9.68 | 2.0 - 25.8 | 1.07 | 0.36 |
| >0.274 | 93.10 | 77.2 - 99.2 | 9.68 | 2.0 - 25.8 | 1.03 | 0.71 |
| >0.288 | 93.10 | 77.2 - 99.2 | 12.90 | 3.6 - 29.8 | 1.07 | 0.53 |
| >0.397 | 89.66 | 72.6 - 97.8 | 12.90 | 3.6 - 29.8 | 1.03 | 0.80 |
| >0.637 | 89.66 | 72.6 - 97.8 | 29.03 | 14.2 - 48.0 | 1.26 | 0.36 |
| >0.664 | 86.21 | 68.3 - 96.1 | 29.03 | 14.2 - 48.0 | 1.21 | 0.48 |
| >0.72 | 86.21 | 68.3 - 96.1 | 35.48 | 19.2 - 54.6 | 1.34 | 0.39 |
| >0.752 | 82.76 | 64.2 - 94.2 | 35.48 | 19.2 - 54.6 | 1.28 | 0.49 |
| >0.831 | 82.76 | 64.2 - 94.2 | 41.94 | 24.5 - 60.9 | 1.43 | 0.41 |
| >0.959 | 79.31 | 60.3 - 92.0 | 41.94 | 24.5 - 60.9 | 1.37 | 0.49 |
| >0.996 | 79.31 | 60.3 - 92.0 | 45.16 | 27.3 - 64.0 | 1.45 | 0.46 |
| >1.192 | 72.41 | 52.8 - 87.3 | 45.16 | 27.3 - 64.0 | 1.32 | 0.61 |
| >1.222 | 72.41 | 52.8 - 87.3 | 54.84 | 36.0 - 72.7 | 1.60 | 0.50 |
| >1.259 | 68.97 | 49.2 - 84.7 | 54.84 | 36.0 - 72.7 | 1.53 | 0.57 |
| >1.365 | 68.97 | 49.2 - 84.7 | 58.06 | 39.1 - 75.5 | 1.64 | 0.53 |
| >1.41 | 65.52 | 45.7 - 82.1 | 58.06 | 39.1 - 75.5 | 1.56 | 0.59 |
| >1.425 | 65.52 | 45.7 - 82.1 | 61.29 | 42.2 - 78.2 | 1.69 | 0.56 |
| >1.787 | 41.38 | 23.5 - 61.1 | 61.29 | 42.2 - 78.2 | 1.07 | 0.96 |
| >1.828 | 41.38 | 23.5 - 61.1 | 64.52 | 45.4 - 80.8 | 1.17 | 0.91 |
| >1.9 | 34.48 | 17.9 - 54.3 | 64.52 | 45.4 - 80.8 | 0.97 | 1.02 |
| >2.057 | 34.48 | 17.9 - 54.3 | 70.97 | 52.0 - 85.8 | 1.19 | 0.92 |
| >2.093 | 31.03 | 15.3 - 50.8 | 70.97 | 52.0 - 85.8 | 1.07 | 0.97 |
| >2.168 | 31.03 | 15.3 - 50.8 | 74.19 | 55.4 - 88.1 | 1.20 | 0.93 |
| >2.308 | 24.14 | 10.3 - 43.5 | 74.19 | 55.4 - 88.1 | 0.94 | 1.02 |
| >2.59 | 24.14 | 10.3 - 43.5 | 80.65 | 62.5 - 92.5 | 1.25 | 0.94 |
| >2.676 | 17.24 | 5.8 - 35.8 | 80.65 | 62.5 - 92.5 | 0.89 | 1.03 |
| >2.867 | 17.24 | 5.8 - 35.8 | 90.32 | 74.2 - 98.0 | 1.78 | 0.92 |
| >3.68 | 3.45 | 0.09 - 17.8 | 90.32 | 74.2 - 98.0 | 0.36 | 1.07 |
| >4.188 | 3.45 | 0.09 - 17.8 | 96.77 | 83.3 - 99.9 | 1.07 | 1.00 |
| >4.314 | 0.00 | 0.0 - 11.9 | 96.77 | 83.3 - 99.9 | 0.00 | 1.03 |
| >5.421 | 0.00 | 0.0 - 11.9 | 100.00 | 88.8 - 100.0 |  | 1.00 |

|  |
| --- |
